# Supplementary material for: Real-world Comparison of Faricimab and Aflibercept as Second-line Therapies for Neovascular Age-Related Macular Degeneration
Source: Research Square preprint supplement (doi:10.21203/rs.3.rs-8570513/v1), 2026-02-09
Supplement: Supplementary file 1 [file 34c2f544d71079ed7ecdd508.docx]

## Table 4. Multivariable Analysis for Predictors of Anatomical Outcome

##

|  | B (µm) | 95% CI | Standardized β | p-value |
| --- | --- | --- | --- | --- |
| Second-line drug  (faricimab) | 20.34 | [−47.78, 88.45] | 0.073 | 0.555 |
| Number of injections | −3.57 | [−7.63, 0.50] | −0.227 | 0.085 |
| Age (years) | 1.18 | [−2.15, 4.51] | 0.073 | 0.484 |
| Sex (male) | −21.40 | [−65.85, 23.04] | −0.077 | 0.342 |
| Eye laterality (right) | −32.21 | [−77.06, 12.64] | −0.116 | 0.157 |
| Lens status  (pseudophakic) | −20.54 | [−74.57, 33.48] | −0.074 | 0.453 |
| First-line agent  (bevacizumab) | −50.54 | [−109.41, 8.33] | −0.163 | 0.092 |
| Baseline BCVA | −19.75 | [−73.54, 34.03] | −0.062 | 0.468 |
| Baseline CMT | −0.510 | [−0.686, −0.335] | −0.565 | **< 0.001** |
| Follow-up duration  (months) | 28.57 | [−4.96, 62.10] | 0.229 | 0.094 |
| Final interval (weeks) | −8.40 | [−16.96, 0.16] | −0.215 | **0.054** |
| BCVA; best-corrected visual acuity, CMT; central macular thickness | | | | |

## 
