# Supplementary material for: Real-world Comparison of Faricimab and Aflibercept as Second-line Therapies for Neovascular Age-Related Macular Degeneration
Source: Research Square preprint supplement (doi:10.21203/rs.3.rs-8570513/v1), 2026-02-09
Supplement: Supplementary file 2 [file 53d2179828dd25cc10a00e12.docx]

## Table 3. Multivariable Analysis for Predictors of Visual Outcome

###

|  | B (logMAR) | 95% CI | Standardized β | p-value |
| --- | --- | --- | --- | --- |
| Second-line drug  (faricimab) | 0.015 | [−0.171, 0.201] | 0.021 | 0.874 |
| Number of   injections | -0.020 | [−0.031, −0.009] | −0.499 | **0.001** |
| Age (years) | 0.005 | [−0.004, 0.014] | 0.121 | 0.287 |
| Sex (male) | -0.006 | [−0.128, 0.115] | −0.009 | 0.919 |
| Eye laterality (right) | -0.044 | [−0.166, 0.079] | −0.063 | 0.481 |
| Lens status  (pseudophakic) | 0.043 | [−0.104, 0.191] | 0.062 | 0.562 |
| First-line agent  (bevacizumab) | -0.019 | [−0.180, 0.142] | −0.025 | 0.813 |
| Baseline BCVA | -0.207 | [−0.354, −0.060] | −0.259 | **0.006** |
| Baseline CMT | 0.000 | [0.000, 0.001] | 0.057 | 0.590 |
| Follow-up duration  (months) | 0.081 | [−0.010, 0.173] | 0.258 | 0.082 |
| Final interval   (weeks) | -0.020 | [−0.043, 0.003] | −0.202 | 0.094 |
| BCVA; best-corrected visual acuity, CMT; central macular thickness | | | | |

## 
