# Supplementary material for: Real-world Comparison of Faricimab and Aflibercept as Second-line Therapies for Neovascular Age-Related Macular Degeneration
Source: Research Square preprint supplement (doi:10.21203/rs.3.rs-8570513/v1), 2026-02-09
Supplement: Supplementary file 3 [file 900423b7d75d5ddead0f48a3.docx]

## Table 2. Visual & Anatomical Outcomes

###

|  | Faricimab (n=88) | Aflibercept (n=89) | p-value | Total  (n=177) |
| --- | --- | --- | --- | --- |
| BCVA (logMAR) | | | |  |
| Baseline | 0.597 ± 0.422 | 0.464 ± 0.364 | 0.026 | 0.530 ± 0.398 |
| Final | 0.434 ± 0.447 | 0.470 ± 0.525 | 0.404 | 0.452 ± 0.487 |
| Δ | -0.072 ± 0.284 | 0.006 ± 0.307 | 0.084 | -0.032 ± 0.298 |
| CMT (µm) | | | |  |
| Baseline | 329.07 ± 121.21 | 362.63 ± 95.60 | **0.043** | 345.94 ± 110.07 |
| Final | 272.91 ± 95.61 | 273.27 ± 69.91 | 0.977 | 273.09 ± 83.44 |
| Δ | -56.16 ± 95.75 | -89.36 ± 86.27 | **0.016** | -72.85 ± 92.36 |
| Final Injection   Interval (weeks) | 7.6 ± 3.0 | 7.5 ± 2.9 | 0.675 | 7.5 ± 3.0 |
| Treatment switch | 4 (4.54%) | 11 (12.35%) | 0.103 | 15 (8.47%) |
| BCVA; best-corrected visual acuity, CMT; central macular thickness | | | | |

### 
