# Supplementary material for: Real-world Comparison of Faricimab and Aflibercept as Second-line Therapies for Neovascular Age-Related Macular Degeneration
Source: Research Square preprint supplement (doi:10.21203/rs.3.rs-8570513/v1), 2026-02-09
Supplement: Supplementary file 4 [file c3afcfcee9ddcf2248621294.docx]

## Table 1. Demographics

|  | Aflibercept  (n=89) | Faricimab  (n=88) | p-value | Total  (n=177) |
| --- | --- | --- | --- | --- |
| Age | 80.9 ± 7.1 | 78.1 ± 9.2 | **0.026** | 79.5 ± 8.3 |
| Sex (male) | 47 (52.8%) | 46 (52.3%) | 0.818 | 93 (52.5%) |
| Eye laterality (right) | 45 (50.6%) | 47 (53.4%) | 0.705 | 92 (52.0%) |
| Lens status (pseudophakic) | 41 (46.1%) | 49 (55.7%) | 0.201 | 90 (50.9%) |
| Prior injection type: | | | | |
| Bevacizumab | 76 (85.4%) | 62 (70.5%) | **0.017** | 138 (78.0%) |
| Ranibizumab | 13 (14.6%) | 26 (29.5%) | 39 (22.0%) |
| Total prior injections | 8.83 ± 6.1 | 12.71 ± 9.7 | **0.008** | 10.76 ± 8.5 |
